# Supplementary material for: Integrating Transcriptome and Genome Re-Sequencing Data to Identify Key Genes and Mutations Affecting Chicken Eggshell Qualities
Source: PubMed Central journal article supplement (PMC4431873; doi:10.1371/journal.pone.0125890), 2015-05-14
Supplement: pone.0125890.s005.pdf [file pone.0125890.s005.pdf]

**Table A. Primers used for qPCR of calcium signaling pathway genes**

| <b>Gene symbol</b> | <b>Forward primer</b> | <b>Reverse primer</b> |
|--------------------|-----------------------|-----------------------|
| <i>CACNA1E</i>     | AGCAGCGACAACACCTACAA  | GATGTCAGGGGACAGCAAGT  |
| <i>ERBB4</i>       | TACACGTACGGGGCTTTTTG  | GTCAGTGCAGGGCTTACACA  |
| <i>PLCB2</i>       | ATGGTGGACCTCACTTTCCA  | GGTGTACCGAGAAGCGTTGT  |
| <i>GRM1</i>        | GAGATGCCCCAGGAAGGTAT  | CGGACCATTCCACTCTTGTT  |
| <i>CACNA1H</i>     | CTGGAAGGATGGGTTGACAT  | GCTATCACAACCAGGCACAA  |
| <i>ADCY8</i>       | TGTCTTGCCACGGTTTGTAG  | CGTCTGCAAAAAGAATGCTG  |
| <i>PDGFRB</i>      | GGCAATGAGCTGGTCAACTT  | GATGAGGATGGAACGGATGT  |
| <i>PRKCB</i>       | CTCACTGCTGTATGGCCTCA  | TCGGCCCTGATGTATATCCT  |
| <i>OXR</i>         | TCTTCTTCGTGCAGATGTGG  | GCATGTAGATCCAGGGGTTG  |
| <i>SLC25A4</i>     | CAGATCACAGCGGAGAAACA  | CGGATGACGTTGGCTAGATT  |
| <i>NCX1</i>        | AGCAAGGAGGAGGAAGAACG  | ATGAGCTTGTCCACCGTGTT  |
| <i>PRKCA</i>       | CCCAACCTTCTGTGACCACT  | GTGTGATCCATGCCACAGAG  |
| <i>ITPKA</i>       | TTCAGCTGGATGATTTGCTT  | TGGTTTCTCACGGGCTTTAG  |
| <i>CACNA1D</i>     | AAAGCCCTAAGAGCCTTTCG  | AGGGGAACCATGGCTTTTAT  |
| <i>ADRA1D</i>      | GGGGTCTTCTTGGCTGTCTT  | AGTTGGTGACTGTCTGCAGGT |
| <i>GNA11</i>       | TCTGCCAACTCAGCAAGATG  | TCTGATCGTTGGCCTCCTAC  |

**Table B. Primers used for direct PCR sequencing of the potential group-specific mutations**

| <b>Gene symbol</b> | <b>position</b> | <b>Forward primer</b> | <b>Reverse primer</b>  |
|--------------------|-----------------|-----------------------|------------------------|
| <i>CACNA1H</i>     | 14:5306161      | ACAAATCTTGCAGCGAACAGA | GGGTGATAGACTTTGCCTTCC  |
| <i>ADCY8</i>       | 2:140544236     | CTACAAATGAGCCAACAGCC  | CTATGCCAACTTTCCTAACC   |
| <i>GRM1</i>        | 3:46087815      | TGTTTTGCAGTGAGCCTGAG  | AACATATCAACATCCGTCCA   |
| <i>GRM1</i>        | 3:46087816      | TGTTTTGCAGTGAGCCTGAG  | AACATATCAACATCCGTCCA   |
| <i>OC-116</i>      | 4:45086662      | ACCTCTGGCTGGGTCCTGGC  | ACAAGAGCTGGAGGCCCTA    |
| <i>OC-116</i>      | 4:45086821      | ACCTCTGGCTGGGTCCTGGC  | ACAAGAGCTGGAGGCCCTA    |
| <i>OC-116</i>      | 4:45087521      | GGCTACCACCCTCACTCCA   | ATCACTCCAGCAAGCAAAGG   |
| <i>LTF</i>         | 9:4103017       | GCTGGAGGATACCTGTGCTT  | TGGGCTCTGTCAGTCTGGAGAA |

**Table C. RNA sequencing of eggshell quality in Rhode Island White hens**

|                       | LES -S1    | LES -S2    | NES -S1    | NES -S2    |
|-----------------------|------------|------------|------------|------------|
| Read length(bp)       | 100        | 100        | 100        | 100        |
| Sequencing yield(Gbp) | 5.9        | 6.1        | 3.8        | 7.1        |
| Total sequenced reads | 59,102,740 | 61,758,198 | 37,890,548 | 71,669,488 |
| Mapped reads          | 47,708,816 | 49,410,949 | 29,590,618 | 55,989,636 |
| Mapping rate          | 80.72%     | 80.00%     | 78.09%     | 78.12%     |

LES: low eggshell strength.

NES: normal eggshell strength.

**Table D. Whole genome re-sequencing of eggshell quality in Rhode Island White hens**

| Statistics                       | Low eggshell strength | Normal eggshell strength |
|----------------------------------|-----------------------|--------------------------|
| Read length(bp)                  | 101                   | 101                      |
| Sequencing yield(Gbp)            | 32.2                  | 36.8                     |
| Total sequenced reads            | 312,999,278           | 355,203,584              |
| Mapped reads                     | 295,310,255           | 334,432,980              |
| Mapping rate                     | 94.35%                | 94.15%                   |
| Mapping depth                    | 29.82 X               | 33.77 X                  |
| Coverage                         | 94.15%                | 93.95%                   |
| No. of SNP calls                 | 7,450,661             | 7,588,813                |
| % novel SNP calls                | 35.98%                | 36.32%                   |
| $\theta_{\text{SNP}}(10^{-3})$   | 8.66                  | 7.63                     |
| No. of Indel calls               | 809,833               | 829,107                  |
| % novel Indel calls              | 88.83%                | 88.90%                   |
| $\theta_{\text{Indel}}(10^{-3})$ | 0.79                  | 0.81                     |
| CNV                              | 2,416                 | 2,944                    |

**Table E. Frameshift mutations in the differentially expressed genes in KEGG pathway**

| Genes              | Depth | Position                 | Old/New    | Com. PULES. PUNES. |
|--------------------|-------|--------------------------|------------|--------------------|
| <i>STXBP5L</i>     | 17    | 1:79112770               | CG/C       | +                  |
| <i>TMC3</i>        | 20    | 10:11576071 <sup>R</sup> | G/GC       | +                  |
| <i>CNGB1</i>       | 17    | 11:458088                | G/GA       | +                  |
| <i>ASPN</i>        | 29    | 12:3391965 <sup>R</sup>  | AC/A       | +                  |
| <i>PRKCB</i>       | 13    | 14:6644361               | C/CG       | +                  |
| <i>PRKCB</i>       | 13    | 14:6644367               | C/CG       | +                  |
| <i>SVOP</i>        | 32    | 15:6613530               | G/GA       | +                  |
| <i>CCDC60</i>      | 36    | 15:9679408 <sup>R</sup>  | T/TC       | +                  |
| <i>C4</i>          | 14    | 16:53183                 | T/TG       | +                  |
| <i>B-G</i>         | 15    | 16:346206                | CG/C       | +                  |
| <i>PTGDS</i>       | 12    | 17:510123                | A/AC       | +                  |
| <i>KCNH2</i>       | 10    | 2:336742 <sup>R</sup>    | CT/C       | +                  |
| ENSGALG00000009407 | 28    | 2:22762387 <sup>R</sup>  | GTGGAAGA/G | +                  |
| <i>JPH2</i>        | 185   | 10:5855071               | T/TCTGGAG  | +                  |
| ENSGALG00000026763 | 27    | 22:2458509 <sup>R</sup>  | AC/A       | +                  |
| <i>SLC20A1</i>     | 18    | 22:4025356               | G/GA       | +                  |
| <i>SLC20A1</i>     | 20    | 22:4025358               | AG/A       | +                  |
| <i>WDR27</i>       | 30    | 3:40501504               | GA/G       | +                  |
| <i>HPGDS</i>       | 32    | 4:36636020 <sup>R</sup>  | A/AT       | +                  |

Superscript letter "R" represent SNP sites were also detected using RNA-seq

Com.: common; PULES: Potential unique LES; PUNES: Potential unique NES
